# Supplementary material for: Utilization analysis of laboratory tests using health insurance claims data: advancing nationwide diagnostic stewardship monitoring systems
Source: publisher site journal article supplement (doi:10.1515/cclm-2025-0641), 2025-07-14
Supplement: Supplementary file 1 [file j_cclm-2025-0641_suppl_001.docx]

**Utilization analysis of laboratory tests using health insurance claims data: advancing nationwide diagnostic stewardship monitoring systems**

Se-eun Koo, Jiyeon Kim, and Kuenyoul Park

**Supplementary material**

**Supplementary Table 1.** Insurance Codes corresponding to Test methods mapped using HIRA’s coding system

| **Test name** | **Test method** | **Corresponding code** |
| --- | --- | --- |
| Stool ova and parasite tests | Direct smear method | B0600, D6401 |
|  | Concentration method | B0611, B0612, B6013, D6402 |
|  | Trematode Egg Examination | B0641, D6404 |
| Tuberculosis culture test | Solid medium | B4054, D6011 |
|  | Liquid Medium | B4055, D6012 |
| Bleeding time |  | B1510, D1001 |

**Supplementary Table 2A.** Annual claims count and percentage based on tuberculosis culture media

| **Media** | **2018** | **2019** | **2020** | **2021** | **2022** | **2023** |
| --- | --- | --- | --- | --- | --- | --- |
| Both media | 580,717 (84.62%) | 600,748 (86.43%) | 504,837 (88.89%) | 511,034 (90.42%) | 534,508 (90.96%) | 630,708 (91.37%) |
| Liquid only | 8,971 (1.31%) | 7,795 (1.12%) | 6,210 (1.09%) | 5,681 (1.01%) | 5,332 (0.91%) | 5,151 (0.75%) |
| Solid only | 96,614 (14.08%) | 86,529 (12.45%) | 56,902 (10.02%) | 48,470 (8.58%) | 47,792 (8.13%) | 54,423 (7.88%) |

“Both media” refers to cultures performed using both solid and liquid media, whereas “liquid only” and “solid only” indicate cultures conducted exclusively with liquid or solid media, respectively.

**Supplementary Table 2B.** Yearly inadequate tuberculosis test claims by hospital type

| **Hospital type** | **Year** | **Claim count** | **Inadequate claim count** | **Proportion** |
| --- | --- | --- | --- | --- |
| Medical Clinic | 2018 | 15361 | 8740 | 56.9 |
| Medical Clinic | 2019 | 18540 | 11336 | 61.14 |
| Medical Clinic | 2020 | 12315 | 7426 | 60.3 |
| Medical Clinic | 2021 | 10854 | 6181 | 56.95 |
| Medical Clinic | 2022 | 10418 | 4900 | 47.03 |
| Medical Clinic | 2023 | 21159 | 7234 | 34.19 |
| Nursing Hospital | 2018 | 1807 | 832 | 46.04 |
| Nursing Hospital | 2019 | 2070 | 829 | 40.05 |
| Nursing Hospital | 2020 | 2474 | 1364 | 55.13 |
| Nursing Hospital | 2021 | 2391 | 1269 | 53.07 |
| Nursing Hospital | 2022 | 2168 | 1071 | 49.4 |
| Nursing Hospital | 2023 | 2241 | 876 | 39.09 |
| Primary Hospital | 2018 | 56701 | 31132 | 54.91 |
| Primary Hospital | 2019 | 54160 | 27311 | 50.43 |
| Primary Hospital | 2020 | 38081 | 18910 | 49.66 |
| Primary Hospital | 2021 | 31425 | 15921 | 50.66 |
| Primary Hospital | 2022 | 32546 | 15882 | 48.8 |
| Primary Hospital | 2023 | 40216 | 18627 | 46.32 |
| Psychiatric Hospital | 2020 | 1 | 1 | 100 |
| Psychiatric Hospital | 2021 | 345 | 171 | 49.57 |
| Psychiatric Hospital | 2022 | 482 | 290 | 60.17 |
| Psychiatric Hospital | 2023 | 504 | 265 | 52.58 |
| Public Health Medical Center | 2018 | 5 | 1 | 20 |
| Public Health Medical Center | 2019 | 1 | 0 | 0 |
| Public Health Medical Center | 2020 | 7 | 0 | 0 |
| Public Health Medical Center | 2021 | 4 | 4 | 100 |
| Public Health Medical Center | 2022 | 3 | 0 | 0 |
| Public Health Medical Center | 2023 | 2 | 1 | 50 |
| Secondary Hospital | 2018 | 323934 | 53193 | 16.42 |
| Secondary Hospital | 2019 | 328606 | 50370 | 15.33 |
| Secondary Hospital | 2020 | 258905 | 31387 | 12.12 |
| Secondary Hospital | 2021 | 230119 | 26999 | 11.73 |
| Secondary Hospital | 2022 | 245763 | 27498 | 11.19 |
| Secondary Hospital | 2023 | 301665 | 29438 | 9.76 |
| Tertiary Hospital | 2018 | 288494 | 11687 | 4.05 |
| Tertiary Hospital | 2019 | 291695 | 4478 | 1.54 |
| Tertiary Hospital | 2020 | 256166 | 4024 | 1.57 |
| Tertiary Hospital | 2021 | 290047 | 3606 | 1.24 |
| Tertiary Hospital | 2022 | 296252 | 3483 | 1.18 |
| Tertiary Hospital | 2023 | 324495 | 3133 | 0.97 |

**Supplementary Table 2C.** Yearly inadequate tuberculosis test claims by hospital region

| **Region** | **Year** | **Claim count** | **Inadequate claim count** | **Proportion** |
| --- | --- | --- | --- | --- |
| Busan | 2018 | 47574 | 8267 | 17.38 |
| Busan | 2019 | 45180 | 4778 | 10.58 |
| Busan | 2020 | 35876 | 2796 | 7.79 |
| Busan | 2021 | 34809 | 2309 | 6.63 |
| Busan | 2022 | 36007 | 2217 | 6.16 |
| Busan | 2023 | 44624 | 3414 | 7.65 |
| Chungbuk | 2018 | 12386 | 2871 | 23.18 |
| Chungbuk | 2019 | 12028 | 2955 | 24.57 |
| Chungbuk | 2020 | 10810 | 2240 | 20.72 |
| Chungbuk | 2021 | 10476 | 1943 | 18.55 |
| Chungbuk | 2022 | 10599 | 2015 | 19.01 |
| Chungbuk | 2023 | 12233 | 1987 | 16.24 |
| Chungnam | 2018 | 17889 | 2910 | 16.27 |
| Chungnam | 2019 | 18047 | 2971 | 16.46 |
| Chungnam | 2020 | 14574 | 2324 | 15.95 |
| Chungnam | 2021 | 14073 | 1968 | 13.98 |
| Chungnam | 2022 | 15606 | 1883 | 12.07 |
| Chungnam | 2023 | 17993 | 2098 | 11.66 |
| Daegu | 2018 | 40528 | 4465 | 11.02 |
| Daegu | 2019 | 43201 | 3675 | 8.51 |
| Daegu | 2020 | 35969 | 2595 | 7.21 |
| Daegu | 2021 | 39373 | 2329 | 5.92 |
| Daegu | 2022 | 41352 | 2226 | 5.38 |
| Daegu | 2023 | 49232 | 2454 | 4.98 |
| Daejeon | 2018 | 20847 | 1488 | 7.14 |
| Daejeon | 2019 | 19825 | 1587 | 8.01 |
| Daejeon | 2020 | 16334 | 944 | 5.78 |
| Daejeon | 2021 | 15536 | 784 | 5.05 |
| Daejeon | 2022 | 16103 | 807 | 5.01 |
| Daejeon | 2023 | 19767 | 872 | 4.41 |
| Gangwon | 2018 | 26665 | 4304 | 16.14 |
| Gangwon | 2019 | 28527 | 3643 | 12.77 |
| Gangwon | 2020 | 22506 | 2230 | 9.91 |
| Gangwon | 2021 | 21293 | 1709 | 8.03 |
| Gangwon | 2022 | 22717 | 1587 | 6.99 |
| Gangwon | 2023 | 24896 | 1826 | 7.33 |
| Gwangju | 2018 | 30000 | 5457 | 18.19 |
| Gwangju | 2019 | 30300 | 6011 | 19.84 |
| Gwangju | 2020 | 22683 | 3926 | 17.31 |
| Gwangju | 2021 | 22451 | 3435 | 15.3 |
| Gwangju | 2022 | 21071 | 2965 | 14.07 |
| Gwangju | 2023 | 24402 | 3061 | 12.54 |
| Gyeongbuk | 2018 | 23256 | 8101 | 34.83 |
| Gyeongbuk | 2019 | 23169 | 7561 | 32.63 |
| Gyeongbuk | 2020 | 18787 | 4954 | 26.37 |
| Gyeongbuk | 2021 | 17510 | 4508 | 25.75 |
| Gyeongbuk | 2022 | 18213 | 4491 | 24.66 |
| Gyeongbuk | 2023 | 22612 | 5380 | 23.79 |
| Gyeonggi | 2018 | 119018 | 18338 | 15.41 |
| Gyeonggi | 2019 | 125170 | 18957 | 15.15 |
| Gyeonggi | 2020 | 100127 | 12839 | 12.82 |
| Gyeonggi | 2021 | 101722 | 10247 | 10.07 |
| Gyeonggi | 2022 | 107003 | 9848 | 9.2 |
| Gyeonggi | 2023 | 129807 | 11807 | 9.1 |
| Gyeongnam | 2018 | 37929 | 8857 | 23.35 |
| Gyeongnam | 2019 | 37075 | 8258 | 22.27 |
| Gyeongnam | 2020 | 30183 | 5161 | 17.1 |
| Gyeongnam | 2021 | 27559 | 3390 | 12.3 |
| Gyeongnam | 2022 | 30227 | 3354 | 11.1 |
| Gyeongnam | 2023 | 35296 | 3854 | 10.92 |
| Incheon | 2018 | 33326 | 11335 | 34.01 |
| Incheon | 2019 | 31695 | 4484 | 14.15 |
| Incheon | 2020 | 27286 | 3702 | 13.57 |
| Incheon | 2021 | 27211 | 3620 | 13.3 |
| Incheon | 2022 | 26941 | 3603 | 13.37 |
| Incheon | 2023 | 31079 | 3530 | 11.36 |
| Jeju | 2018 | 6051 | 215 | 3.55 |
| Jeju | 2019 | 6810 | 155 | 2.28 |
| Jeju | 2020 | 5522 | 86 | 1.56 |
| Jeju | 2021 | 5308 | 101 | 1.9 |
| Jeju | 2022 | 5730 | 82 | 1.43 |
| Jeju | 2023 | 6483 | 88 | 1.36 |
| Jeonbuk | 2018 | 18880 | 1740 | 9.22 |
| Jeonbuk | 2019 | 20022 | 1605 | 8.02 |
| Jeonbuk | 2020 | 17266 | 1224 | 7.09 |
| Jeonbuk | 2021 | 16763 | 1443 | 8.61 |
| Jeonbuk | 2022 | 17079 | 1237 | 7.24 |
| Jeonbuk | 2023 | 20442 | 1015 | 4.97 |
| Jeonnam | 2018 | 19615 | 7656 | 39.03 |
| Jeonnam | 2019 | 21180 | 6873 | 32.45 |
| Jeonnam | 2020 | 17757 | 4533 | 25.53 |
| Jeonnam | 2021 | 17200 | 4142 | 24.08 |
| Jeonnam | 2022 | 17817 | 4635 | 26.01 |
| Jeonnam | 2023 | 20409 | 5529 | 27.09 |
| Sejong | 2018 | 69 | 23 | 33.33 |
| Sejong | 2019 | 90 | 26 | 28.89 |
| Sejong | 2020 | 443 | 19 | 4.29 |
| Sejong | 2021 | 1525 | 13 | 0.85 |
| Sejong | 2022 | 1482 | 11 | 0.74 |
| Sejong | 2023 | 2547 | 50 | 1.96 |
| Seoul | 2018 | 219100 | 18842 | 8.6 |
| Seoul | 2019 | 218911 | 19576 | 8.94 |
| Seoul | 2020 | 181074 | 12627 | 6.97 |
| Seoul | 2021 | 181727 | 11621 | 6.39 |
| Seoul | 2022 | 188212 | 11609 | 6.17 |
| Seoul | 2023 | 215429 | 11915 | 5.53 |
| Ulsan | 2018 | 13169 | 716 | 5.44 |
| Ulsan | 2019 | 13842 | 1209 | 8.73 |
| Ulsan | 2020 | 10752 | 912 | 8.48 |
| Ulsan | 2021 | 10649 | 589 | 5.53 |
| Ulsan | 2022 | 11473 | 554 | 4.83 |
| Ulsan | 2023 | 13031 | 694 | 5.33 |

**Supplementary Table 3A.** Annual claims count and percentage based on the method of the stool ova and parasite test

| Method | 2018 | 2019 | 2020 | 2021 | 2022 | 2023 |
| --- | --- | --- | --- | --- | --- | --- |
| Both methods | 7531 (3.09%) | 6886 (3.04%) | 5731 (3.08%) | 4936 (2.73%) | 3645 (2.08%) | 4308 (2.34%) |
| Concentration  only | 173391 (71.12%) | 160433 (70.93%) | 133909 (71.89%) | 131704 (72.88%) | 130533 (74.56%) | 136780 (74.42%) |
| Direct smear only | 62876 (25.79%) | 58867 (26.03%) | 46625 (25.03%) | 44079 (24.39%) | 40883 (23.35%) | 42718 (23.24%) |

“Both methods” refers to stool ova and parasite tests performed using both the concentration method and direct smear, whereas “Concentration only” and “Direct smear only” indicate tests conducted exclusively with the concentration method or direct smear, respectively.

**Supplementary Table 3B.** Yearly inadequate stool ova and parasite test claims by hospital type

| **Hospital type** | **Year** | **Total claim count** | **Total inadequate claim count** | **Proportion** |
| --- | --- | --- | --- | --- |
| Medical Clinic | 2018 | 8531 | 2391 | 28.03 |
| Medical Clinic | 2019 | 8078 | 2294 | 28.40 |
| Medical Clinic | 2020 | 6966 | 1598 | 22.94 |
| Medical Clinic | 2021 | 6253 | 1445 | 23.11 |
| Medical Clinic | 2022 | 5534 | 1276 | 23.06 |
| Medical Clinic | 2023 | 5251 | 886 | 16.87 |
| Nursing Hospital | 2018 | 367 | 171 | 46.59 |
| Nursing Hospital | 2019 | 358 | 141 | 39.39 |
| Nursing Hospital | 2020 | 638 | 188 | 29.47 |
| Nursing Hospital | 2021 | 720 | 147 | 20.42 |
| Nursing Hospital | 2022 | 455 | 123 | 27.03 |
| Nursing Hospital | 2023 | 510 | 159 | 31.18 |
| Primary Hospital | 2018 | 23678 | 7959 | 33.61 |
| Primary Hospital | 2019 | 22439 | 8106 | 36.12 |
| Primary Hospital | 2020 | 17919 | 6676 | 37.26 |
| Primary Hospital | 2021 | 17348 | 5686 | 32.78 |
| Primary Hospital | 2022 | 16282 | 4851 | 29.79 |
| Primary Hospital | 2023 | 17295 | 5691 | 32.91 |
| Psychiatric Hospital | 2021 | 71 | 3 | 4.23 |
| Psychiatric Hospital | 2022 | 107 | 6 | 5.61 |
| Psychiatric Hospital | 2023 | 91 | 8 | 8.79 |
| Public Health Medical Center | 2018 | 6 | 2 | 33.33 |
| Public Health Medical Center | 2019 | 14 | 0 | 0.00 |
| Public Health Medical Center | 2020 | 6 | 0 | 0.00 |
| Public Health Medical Center | 2021 | 10 | 0 | 0.00 |
| Public Health Medical Center | 2022 | 6 | 0 | 0.00 |
| Public Health Medical Center | 2023 | 9 | 0 | 0.00 |
| Secondary Hospital | 2018 | 135111 | 48996 | 36.26 |
| Secondary Hospital | 2019 | 125289 | 44610 | 35.61 |
| Secondary Hospital | 2020 | 99003 | 34614 | 34.96 |
| Secondary Hospital | 2021 | 94047 | 31449 | 33.44 |
| Secondary Hospital | 2022 | 90809 | 30069 | 33.11 |
| Secondary Hospital | 2023 | 96264 | 30680 | 31.87 |
| Tertiary Hospital | 2018 | 76105 | 3357 | 4.41 |
| Tertiary Hospital | 2019 | 70008 | 3716 | 5.31 |
| Tertiary Hospital | 2020 | 61733 | 3549 | 5.75 |
| Tertiary Hospital | 2021 | 62270 | 5349 | 8.59 |
| Tertiary Hospital | 2022 | 61868 | 4558 | 7.37 |
| Tertiary Hospital | 2023 | 64386 | 5294 | 8.22 |

**Supplementary Table 3C.** Yearly inadequate stool ova and parasite test claims by hospital region

| **Region** | **Year** | **Total claim count** | **Total inadequate claim count** | **Proportion** |
| --- | --- | --- | --- | --- |
| Busan | 2018 | 27872 | 6299 | 22.60 |
| Busan | 2019 | 25800 | 6081 | 23.57 |
| Busan | 2020 | 21613 | 5033 | 23.29 |
| Busan | 2021 | 20807 | 4846 | 23.29 |
| Busan | 2022 | 18891 | 4562 | 24.15 |
| Busan | 2023 | 19267 | 3674 | 19.07 |
| Chungbuk | 2018 | 6585 | 2172 | 32.98 |
| Chungbuk | 2019 | 5301 | 1519 | 28.65 |
| Chungbuk | 2020 | 3837 | 767 | 19.99 |
| Chungbuk | 2021 | 4184 | 684 | 16.35 |
| Chungbuk | 2022 | 3913 | 442 | 11.30 |
| Chungbuk | 2023 | 4078 | 461 | 11.30 |
| Chungnam | 2018 | 4722 | 1034 | 21.90 |
| Chungnam | 2019 | 4448 | 836 | 18.79 |
| Chungnam | 2020 | 3757 | 783 | 20.84 |
| Chungnam | 2021 | 3104 | 593 | 19.10 |
| Chungnam | 2022 | 3129 | 559 | 17.87 |
| Chungnam | 2023 | 3538 | 565 | 15.97 |
| Daegu | 2018 | 17093 | 6421 | 37.57 |
| Daegu | 2019 | 14237 | 6580 | 46.22 |
| Daegu | 2020 | 11856 | 5638 | 47.55 |
| Daegu | 2021 | 12408 | 5657 | 45.59 |
| Daegu | 2022 | 12836 | 4947 | 38.54 |
| Daegu | 2023 | 12523 | 4761 | 38.02 |
| Daejeon | 2018 | 10795 | 807 | 7.48 |
| Daejeon | 2019 | 9363 | 746 | 7.97 |
| Daejeon | 2020 | 6035 | 631 | 10.46 |
| Daejeon | 2021 | 5642 | 901 | 15.97 |
| Daejeon | 2022 | 5748 | 1343 | 23.36 |
| Daejeon | 2023 | 6628 | 1734 | 26.16 |
| Gangwon | 2018 | 10065 | 38 | 0.38 |
| Gangwon | 2019 | 10087 | 31 | 0.31 |
| Gangwon | 2020 | 8931 | 44 | 0.49 |
| Gangwon | 2021 | 8232 | 40 | 0.49 |
| Gangwon | 2022 | 7415 | 12 | 0.16 |
| Gangwon | 2023 | 7697 | 3 | 0.04 |
| Gwangju | 2018 | 15942 | 2481 | 15.56 |
| Gwangju | 2019 | 15047 | 2923 | 19.43 |
| Gwangju | 2020 | 12223 | 2420 | 19.80 |
| Gwangju | 2021 | 11289 | 2204 | 19.52 |
| Gwangju | 2022 | 10492 | 2251 | 21.45 |
| Gwangju | 2023 | 11392 | 2868 | 25.18 |
| Gyeongbuk | 2018 | 11308 | 8660 | 76.58 |
| Gyeongbuk | 2019 | 10905 | 8319 | 76.29 |
| Gyeongbuk | 2020 | 8410 | 6504 | 77.34 |
| Gyeongbuk | 2021 | 7507 | 5839 | 77.78 |
| Gyeongbuk | 2022 | 7578 | 5797 | 76.50 |
| Gyeongbuk | 2023 | 8730 | 6861 | 78.59 |
| Gyeonggi | 2018 | 33064 | 7082 | 21.42 |
| Gyeonggi | 2019 | 31494 | 6347 | 20.15 |
| Gyeonggi | 2020 | 25915 | 4670 | 18.02 |
| Gyeonggi | 2021 | 25771 | 4547 | 17.64 |
| Gyeonggi | 2022 | 24345 | 3559 | 14.62 |
| Gyeonggi | 2023 | 24238 | 3803 | 15.69 |
| Gyeongnam | 2018 | 20006 | 9774 | 48.86 |
| Gyeongnam | 2019 | 19801 | 8982 | 45.36 |
| Gyeongnam | 2020 | 16663 | 7261 | 43.58 |
| Gyeongnam | 2021 | 15759 | 6835 | 43.37 |
| Gyeongnam | 2022 | 14978 | 6514 | 43.49 |
| Gyeongnam | 2023 | 16381 | 6367 | 38.87 |
| Incheon | 2018 | 7941 | 1229 | 15.48 |
| Incheon | 2019 | 6449 | 1215 | 18.84 |
| Incheon | 2020 | 4424 | 515 | 11.64 |
| Incheon | 2021 | 4630 | 446 | 9.63 |
| Incheon | 2022 | 4974 | 432 | 8.69 |
| Incheon | 2023 | 5698 | 532 | 9.34 |
| Jeju | 2018 | 3613 | 1816 | 50.26 |
| Jeju | 2019 | 2979 | 1634 | 54.85 |
| Jeju | 2020 | 2447 | 1322 | 54.03 |
| Jeju | 2021 | 2351 | 1200 | 51.04 |
| Jeju | 2022 | 2156 | 1066 | 49.44 |
| Jeju | 2023 | 2260 | 1176 | 52.04 |
| Jeonbuk | 2018 | 5451 | 581 | 10.66 |
| Jeonbuk | 2019 | 5344 | 611 | 11.43 |
| Jeonbuk | 2020 | 4522 | 705 | 15.59 |
| Jeonbuk | 2021 | 4098 | 660 | 16.11 |
| Jeonbuk | 2022 | 3681 | 557 | 15.13 |
| Jeonbuk | 2023 | 3977 | 533 | 13.40 |
| Jeonnam | 2018 | 7351 | 4076 | 55.45 |
| Jeonnam | 2019 | 7253 | 3890 | 53.63 |
| Jeonnam | 2020 | 5941 | 3055 | 51.42 |
| Jeonnam | 2021 | 6404 | 2851 | 44.52 |
| Jeonnam | 2022 | 7399 | 2827 | 38.21 |
| Jeonnam | 2023 | 7292 | 2798 | 38.37 |
| Sejong | 2018 | 137 | 131 | 95.62 |
| Sejong | 2019 | 170 | 127 | 74.71 |
| Sejong | 2020 | 134 | 75 | 55.97 |
| Sejong | 2021 | 153 | 114 | 74.51 |
| Sejong | 2022 | 238 | 103 | 43.28 |
| Sejong | 2023 | 220 | 51 | 23.18 |
| Seoul | 2018 | 55957 | 7847 | 14.02 |
| Seoul | 2019 | 52237 | 6886 | 13.18 |
| Seoul | 2020 | 45205 | 5270 | 11.66 |
| Seoul | 2021 | 44208 | 4880 | 11.04 |
| Seoul | 2022 | 43470 | 4343 | 9.99 |
| Seoul | 2023 | 45229 | 4596 | 10.16 |
| Ulsan | 2018 | 5896 | 2428 | 41.18 |
| Ulsan | 2019 | 5271 | 2140 | 40.60 |
| Ulsan | 2020 | 4352 | 1932 | 44.39 |
| Ulsan | 2021 | 4172 | 1782 | 42.71 |
| Ulsan | 2022 | 3818 | 1569 | 41.09 |
| Ulsan | 2023 | 4658 | 1935 | 41.54 |

**Supplementary Table 4A.** Annual claims and number of hospitals performing bleeding time tests

| **Year** | **Number of claims** | **Number of hospitals** |
| --- | --- | --- |
| 2018 | 508,304 | 3,840 |
| 2019 | 507,563 | 3,606 |
| 2020 | 460,430 | 3,311 |
| 2021 | 439,641 | 3,275 |
| 2022 | 427,241 | 3,154 |
| 2023 | 420,836 | 2,933 |

**Supplementary Table 4B.** Yearly bleeding time test claims by department

| **Year** | **Department** | **Number of Claims** | **Number of Hospitals** |
| --- | --- | --- | --- |
| 2018 | Anesthesiology and Pain Medicine | 912 | 63 |
| 2018 | Conservative Dentistry | 3 | 3 |
| 2018 | Dentistry | 1 | 1 |
| 2018 | Dermatology | 460 | 64 |
| 2018 | Emergency Medicine | 9198 | 180 |
| 2018 | Family Medicine | 1314 | 145 |
| 2018 | General Internal Medicine | 201 | 3 |
| 2018 | Internal Medicine | 50433 | 969 |
| 2018 | Neurology | 7298 | 167 |
| 2018 | Neurosurgery | 55357 | 283 |
| 2018 | Not Specified | 2 | 1 |
| 2018 | Nuclear Medicine | 5 | 2 |
| 2018 | Obstetrics and Gynecology | 58193 | 223 |
| 2018 | Occupational and Environmental Medicine | 3 | 1 |
| 2018 | Ophthalmology | 13173 | 98 |
| 2018 | Orthopedic Surgery | 204336 | 524 |
| 2018 | Otolaryngology | 20740 | 112 |
| 2018 | Pediatrics | 1822 | 205 |
| 2018 | Plastic Surgery | 5746 | 47 |
| 2018 | Preventive Medicine | 2 | 1 |
| 2018 | Psychiatry | 751 | 47 |
| 2018 | Radiation Oncology | 23 | 2 |
| 2018 | Radiology | 42 | 11 |
| 2018 | Rehabilitation Medicine | 1820 | 117 |
| 2018 | Surgery | 49202 | 360 |
| 2018 | Thoracic Surgery | 3679 | 48 |
| 2018 | Tuberculosis | 6 | 2 |
| 2018 | Urology | 23582 | 161 |
| 2019 | Anesthesiology and Pain Medicine | 1422 | 67 |
| 2019 | Conservative Dentistry | 120 | 4 |
| 2019 | Dermatology | 486 | 52 |
| 2019 | Emergency Medicine | 8010 | 171 |
| 2019 | Family Medicine | 562 | 148 |
| 2019 | General Internal Medicine | 166 | 6 |
| 2019 | Internal Medicine | 47099 | 916 |
| 2019 | Neurology | 6423 | 163 |
| 2019 | Neurosurgery | 57843 | 289 |
| 2019 | Not Specified | 3 | 3 |
| 2019 | Nuclear Medicine | 6 | 1 |
| 2019 | Obstetrics and Gynecology | 56195 | 196 |
| 2019 | Occupational and Environmental Medicine | 5 | 3 |
| 2019 | Ophthalmology | 14197 | 76 |
| 2019 | Oral and Maxillofacial Surgery | 96 | 2 |
| 2019 | Orthopedic Surgery | 217827 | 481 |
| 2019 | Otolaryngology | 16081 | 105 |
| 2019 | Pediatrics | 1671 | 187 |
| 2019 | Plastic Surgery | 6192 | 38 |
| 2019 | Preventive Medicine | 7 | 1 |
| 2019 | Psychiatry | 619 | 45 |
| 2019 | Radiation Oncology | 29 | 2 |
| 2019 | Radiology | 52 | 9 |
| 2019 | Rehabilitation Medicine | 1130 | 119 |
| 2019 | Surgery | 45641 | 332 |
| 2019 | Thoracic Surgery | 3187 | 42 |
| 2019 | Tuberculosis | 1 | 1 |
| 2019 | Urology | 22490 | 145 |
| 2019 | Not Specified | 3 | 2 |
| 2020 | Anesthesiology and Pain Medicine | 1965 | 55 |
| 2020 | Conservative Dentistry | 83 | 1 |
| 2020 | Dentistry | 1 | 1 |
| 2020 | Dermatology | 302 | 44 |
| 2020 | Emergency Medicine | 7389 | 156 |
| 2020 | Family Medicine | 534 | 143 |
| 2020 | General Internal Medicine | 8 | 2 |
| 2020 | Internal Medicine | 41129 | 837 |
| 2020 | Neurology | 4632 | 155 |
| 2020 | Neurosurgery | 54516 | 251 |
| 2020 | Not Specified | 12 | 4 |
| 2020 | Nuclear Medicine | 10 | 1 |
| 2020 | Obstetrics and Gynecology | 52137 | 178 |
| 2020 | Occupational and Environmental Medicine | 1 | 1 |
| 2020 | Ophthalmology | 12729 | 68 |
| 2020 | Oral and Maxillofacial Surgery | 91 | 4 |
| 2020 | Orthopedic Surgery | 202354 | 429 |
| 2020 | Otolaryngology | 14597 | 93 |
| 2020 | Pediatrics | 1145 | 176 |
| 2020 | Plastic Surgery | 5117 | 39 |
| 2020 | Preventive Medicine | 6 | 2 |
| 2020 | Psychiatry | 169 | 44 |
| 2020 | Radiation Oncology | 44 | 3 |
| 2020 | Radiology | 72 | 12 |
| 2020 | Rehabilitation Medicine | 1265 | 124 |
| 2020 | Surgery | 38173 | 314 |
| 2020 | Thoracic Surgery | 2601 | 37 |
| 2020 | Tuberculosis | 1 | 1 |
| 2020 | Urology | 19301 | 133 |
| 2020 | Not Specified | 46 | 3 |
| 2021 | Anesthesiology and Pain Medicine | 1870 | 54 |
| 2021 | Conservative Dentistry | 87 | 1 |
| 2021 | Dentistry | 1 | 1 |
| 2021 | Dermatology | 316 | 51 |
| 2021 | Emergency Medicine | 8512 | 139 |
| 2021 | Family Medicine | 867 | 150 |
| 2021 | General Internal Medicine | 1 | 1 |
| 2021 | Internal Medicine | 42850 | 777 |
| 2021 | Neurology | 3807 | 150 |
| 2021 | Neurosurgery | 51305 | 246 |
| 2021 | Not Specified | 1 | 1 |
| 2021 | Nuclear Medicine | 4 | 2 |
| 2021 | Obstetrics and Gynecology | 50928 | 151 |
| 2021 | Occupational and Environmental Medicine | 1 | 1 |
| 2021 | Ophthalmology | 12798 | 56 |
| 2021 | Oral and Maxillofacial Surgery | 55 | 2 |
| 2021 | Orthopedic Surgery | 185883 | 435 |
| 2021 | Otolaryngology | 13809 | 87 |
| 2021 | Pediatrics | 1432 | 181 |
| 2021 | Plastic Surgery | 4682 | 36 |
| 2021 | Preventive Medicine | 8 | 1 |
| 2021 | Psychiatry | 130 | 48 |
| 2021 | Radiation Oncology | 34 | 4 |
| 2021 | Radiology | 130 | 13 |
| 2021 | Rehabilitation Medicine | 1840 | 121 |
| 2021 | Surgery | 35591 | 286 |
| 2021 | Thoracic Surgery | 2628 | 30 |
| 2021 | Urology | 17946 | 120 |
| 2021 | Not Specified | 2125 | 130 |
| 2022 | Anesthesiology and Pain Medicine | 2345 | 60 |
| 2022 | Conservative Dentistry | 90 | 3 |
| 2022 | Dermatology | 166 | 38 |
| 2022 | Emergency Medicine | 8461 | 142 |
| 2022 | Family Medicine | 1030 | 137 |
| 2022 | General Internal Medicine | 6 | 3 |
| 2022 | Internal Medicine | 41281 | 763 |
| 2022 | Neurology | 3813 | 135 |
| 2022 | Neurosurgery | 49472 | 252 |
| 2022 | Not Specified | 1 | 1 |
| 2022 | Nuclear Medicine | 1 | 1 |
| 2022 | Obstetrics and Gynecology | 51803 | 146 |
| 2022 | Occupational and Environmental Medicine | 265 | 2 |
| 2022 | Ophthalmology | 11269 | 52 |
| 2022 | Oral and Maxillofacial Surgery | 54 | 2 |
| 2022 | Orthopedic Surgery | 177869 | 412 |
| 2022 | Otolaryngology | 12438 | 86 |
| 2022 | Pediatrics | 1325 | 168 |
| 2022 | Plastic Surgery | 4793 | 32 |
| 2022 | Preventive Medicine | 7 | 1 |
| 2022 | Psychiatry | 99 | 39 |
| 2022 | Radiation Oncology | 48 | 2 |
| 2022 | Radiology | 71 | 10 |
| 2022 | Rehabilitation Medicine | 1367 | 104 |
| 2022 | Surgery | 37463 | 281 |
| 2022 | Thoracic Surgery | 2597 | 37 |
| 2022 | Tuberculosis | 1 | 1 |
| 2022 | Urology | 15295 | 99 |
| 2022 | Not Specified | 3811 | 145 |
| 2023 | Anesthesiology and Pain Medicine | 2548 | 49 |
| 2023 | Conservative Dentistry | 69 | 2 |
| 2023 | Dermatology | 145 | 25 |
| 2023 | Emergency Medicine | 14480 | 135 |
| 2023 | Family Medicine | 1141 | 159 |
| 2023 | General Internal Medicine | 14 | 7 |
| 2023 | Internal Medicine | 41549 | 738 |
| 2023 | Neurology | 5105 | 143 |
| 2023 | Neurosurgery | 48024 | 246 |
| 2023 | Not Specified | 14 | 1 |
| 2023 | Obstetrics and Gynecology | 49517 | 159 |
| 2023 | Occupational and Environmental Medicine | 872 | 1 |
| 2023 | Ophthalmology | 9512 | 49 |
| 2023 | Oral and Maxillofacial Surgery | 55 | 1 |
| 2023 | Orthopedic Surgery | 172976 | 403 |
| 2023 | Otolaryngology | 11373 | 79 |
| 2023 | Pediatrics | 1237 | 141 |
| 2023 | Plastic Surgery | 5526 | 26 |
| 2023 | Psychiatry | 117 | 31 |
| 2023 | Radiation Oncology | 42 | 3 |
| 2023 | Radiology | 69 | 7 |
| 2023 | Rehabilitation Medicine | 668 | 113 |
| 2023 | Surgery | 39920 | 272 |
| 2023 | Thoracic Surgery | 2000 | 37 |
| 2023 | Urology | 13862 | 105 |
| 2023 | Not Specified | 1 | 1 |

**Supplementary Table 4C.** Yearly bleeding time test claims by hospital type

| **Year** | **Hospital Type** | **Number of Claims** | **Number of Hospitals** |
| --- | --- | --- | --- |
| 2018 | Medical Clinic | 23169 | 568 |
| 2018 | Nursing Hospital | 283 | 165 |
| 2018 | Primary Hospital | 190689 | 505 |
| 2018 | Public Health Medical Center | 10 | 1 |
| 2018 | Secondary Hospital | 263611 | 224 |
| 2018 | Tertiary Hospital | 30542 | 12 |
| 2019 | Medical Clinic | 19277 | 461 |
| 2019 | Nursing Hospital | 302 | 190 |
| 2019 | Primary Hospital | 198947 | 482 |
| 2019 | Public Health Medical Center | 10 | 1 |
| 2019 | Secondary Hospital | 262063 | 211 |
| 2019 | Tertiary Hospital | 26964 | 12 |
| 2020 | Medical Clinic | 18528 | 397 |
| 2020 | Nursing Hospital | 362 | 203 |
| 2020 | Primary Hospital | 190399 | 445 |
| 2020 | Public Health Medical Center | 1 | 1 |
| 2020 | Secondary Hospital | 227502 | 208 |
| 2020 | Tertiary Hospital | 23638 | 12 |
| 2021 | Medical Clinic | 18088 | 385 |
| 2021 | Nursing Hospital | 303 | 175 |
| 2021 | Primary Hospital | 188629 | 442 |
| 2021 | Psychiatric Hospital | 24 | 15 |
| 2021 | Secondary Hospital | 195633 | 193 |
| 2021 | Tertiary Hospital | 36964 | 13 |
| 2022 | Medical Clinic | 17118 | 359 |
| 2022 | Nursing Hospital | 269 | 167 |
| 2022 | Primary Hospital | 188800 | 416 |
| 2022 | Psychiatric Hospital | 29 | 18 |
| 2022 | Public Health Medical Center | 2 | 1 |
| 2022 | Secondary Hospital | 189400 | 201 |
| 2022 | Tertiary Hospital | 31623 | 13 |
| 2023 | Medical Clinic | 15236 | 337 |
| 2023 | Nursing Hospital | 337 | 182 |
| 2023 | Primary Hospital | 192592 | 422 |
| 2023 | Psychiatric Hospital | 159 | 17 |
| 2023 | Secondary Hospital | 185902 | 196 |
| 2023 | Tertiary Hospital | 26610 | 12 |
